# Supplementary material for: The Association Between S100A8/A9 and the Development of Very Late Stent Thrombosis in Patients With Acute Myocardial Infarction
Source: PubMed Central journal article supplement — Clin Appl Thromb Hemost. 2020 Jul 31;26:1076029620943295. doi: 10.1177/1076029620943295 (PMC7401045; doi:10.1177/1076029620943295), 2020-07-31
Supplement: Supplementary_material.pdf [file Supplementary_material.pdf]

**Supplementary Table 1. Results of univariate Cox regression analysis**

| <b>Variables</b>        | <b>HR</b> | <b>95% CI</b> | <b>P value</b> |
|-------------------------|-----------|---------------|----------------|
| Diabetes mellitus       | 1.669     | 0.740–3.90    | 0.212          |
| Proximal lesion         | 0.531     | 0.228–1.236   | 0.142          |
| No. of diseased vessels | 1.283     | 0.826–1.993   | 0.267          |
| LVEF                    | 0.940     | 0.881–1.003   | 0.062          |
| LVEDD                   | 1.073     | 0.996–1.157   | 0.065          |
| hs-CRP level            | 1.156     | 0.333–4.013   | 0.820          |
| S100A8/A9 level         | 1.003     | 1.001–1.005   | < 0.001        |

CI, confidence interval; HR, hazard ratio; hs-CRP, high sensitivity C-reactive protein;

LVEDD, left ventricle ending diastolic diameter; LVEF, left ventricle ejection fraction
